# Supplementary material for: A Powerful Test of Parent-of-Origin Effects for Quantitative Traits Using Haplotypes
Source: PLoS One. 2011 Dec 13;6(12):e28909. doi: 10.1371/journal.pone.0028909 (PMC3236760; doi:10.1371/journal.pone.0028909)
Supplement: Appendix S1 — The Expectation for the Variance Components in the EM Algorithm. (DOC) [file pone.0028909.s005.doc]

**Appendix S1**

**The Expectation for the Variance Components in the EM Algorithm**

In model (2)

The posterior likelihood, given and current parameter estimates , , and , is

where ,

Denote Then the expectation of with respect to is the augmented expectation, given by

(A.1)

Replacing (a.2)-a(.4) back to (A.1), becomes

Denote the singular value decomposition of the kinship matrix as where is a diagonal matrix with the diagonal elements . Then the last part of (A.5) becomes

Replace this in Q and take the first derivative of Q with respect to and , we will have

Solve for , we have

Similarly, we can have

where and . #
