# Supplementary material for: A Powerful Test of Parent-of-Origin Effects for Quantitative Traits Using Haplotypes
Source: PLoS One. 2011 Dec 13;6(12):e28909. doi: 10.1371/journal.pone.0028909 (PMC3236760; doi:10.1371/journal.pone.0028909)
Supplement: Appendix S2 — Revised Elston-Stewart Algorithm. (DOC) [file pone.0028909.s006.doc]

**Appendix S2**

Revised Elston-Stewart Algorithm

1. Starting from all individuals in the last generation, for individual *k* let .

2. Then for the previous generation, calculate the conditional probability for a particular combination of two haplotypes, *Hk*, of individual *k*, his/her spouses and their offspring., i.e.,

(A.1)

where *Gj* denotes the genotype of individual *j*, is the probability that can be determined by our model (2) and is the transmission probability.

These two probabilities are the key differences between Eq. (A.1) and the traditional E-S method originally used in linkage analysis. In our revised implementation, the “penetrance” probability can be expanded:

where are the sourced genotypes at the testing locus of this offspring and are the sourced genotype combination of non-testing loci, is composed by and , and is composed by and . The last line in the equation results from being independent of Y at none testing loci. Thus the probability is determined by both haplotypes and their origins and is a function of all covariate effects, 1 and 2. In association studies, 2 is irrelevant, so, the sources of haplotypes do not matter.

The transmission probability in Eq. (A.1) is the conditional probability of sourced haplotype given parental non-sourced haplotypes; while in the traditional method, it is the conditional probability of genotypes given parental genotypes without considering the parents of origin of the alleles.

3. Repeat step 2 until all founders and their possible haplotypes have been exhausted.

4. Take the sum of all likelihood for all families, and maximize it with respect to parameters  and *1,….., t*.
